# Supplementary material
Source: PubMed Central journal article supplement (PMC2528134)
Supplement: pp.108.121897_6.pdf [file pp.108.121897_6.pdf]

Figure S6  
Park, et al.

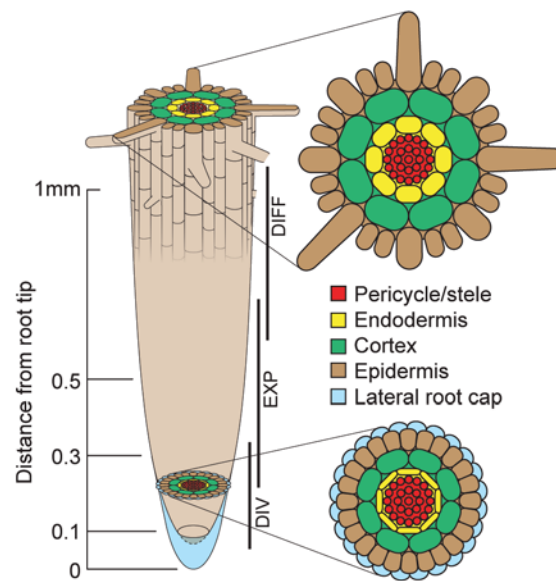

**Figure S6. Schematic of a wild-type Arabidopsis root.** The image was adapted from (Schiefelbein et al., 1997). Transverse sections of root division/expansion and differentiation zones are shown on the right. Distinct cell layers are indicated by color. Blue represents lateral root cap, Brown; epidermal cell, Green; cortex cell, Yellow; endodermis, Red; pericycle/stele. DIV; Division zone, EXP; Expansion zone, DIFF; Differentiation zone. An approximate scale relative to the root tip of sections imaged in Figure 6 is shown on the left side of the root schematic (see the text for detail).
